# Supplementary material for: Global sensitivity analysis of GEOS-Chem modeled ozone andhydrogen oxides during the INTEX campaigns
Source: Copernicus journal article supplement (doi:10.5194/acp-2017-660), 2017-07-26
Supplement: Supplementary file 1 [file acp-2017-660-supplement.pdf]

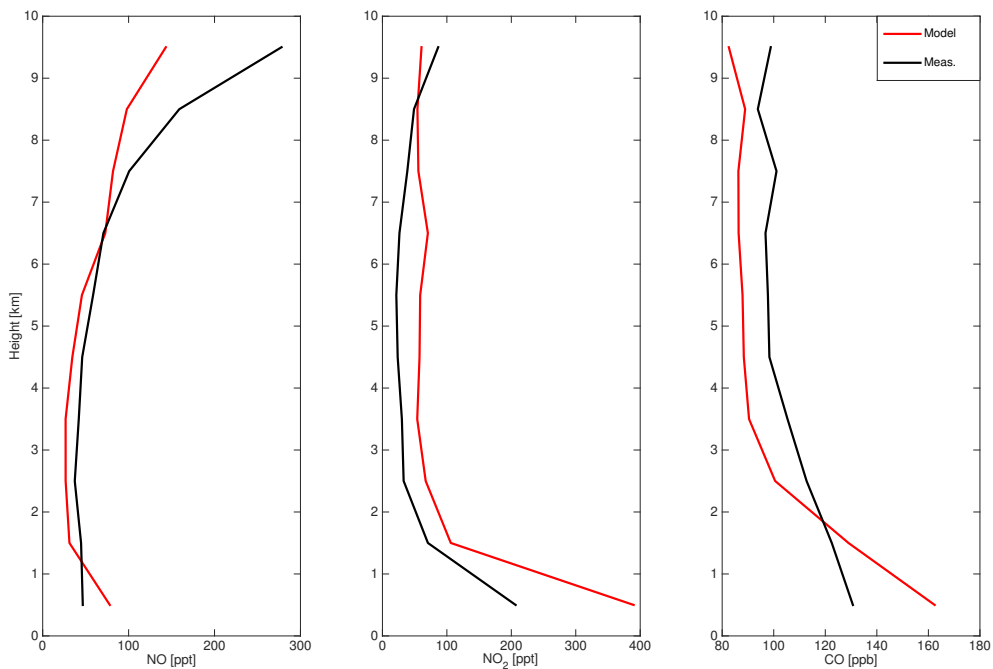

**Figure S 1.** Vertical profile for median modeled (red) and measured (black) NO, NO<sub>2</sub>, and CO for INTEX-A flight data binned by kilometer.

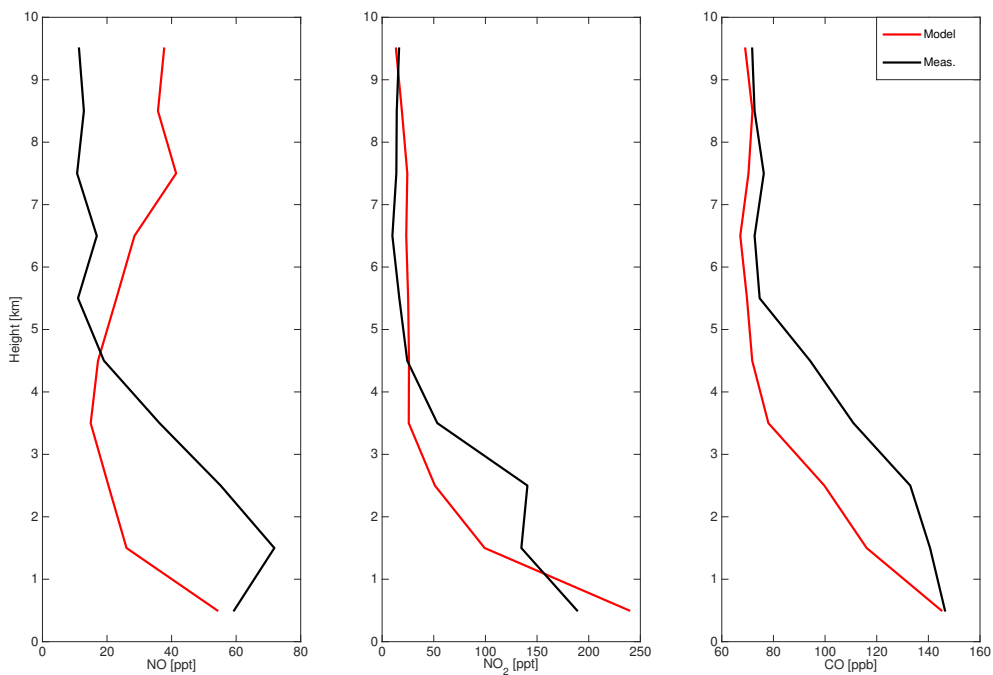

**Figure S 2.** Vertical profile for median modeled (red) and measured (black) NO, NO<sub>2</sub>, and CO for Houston based INTEX-B flight data binned by kilometer

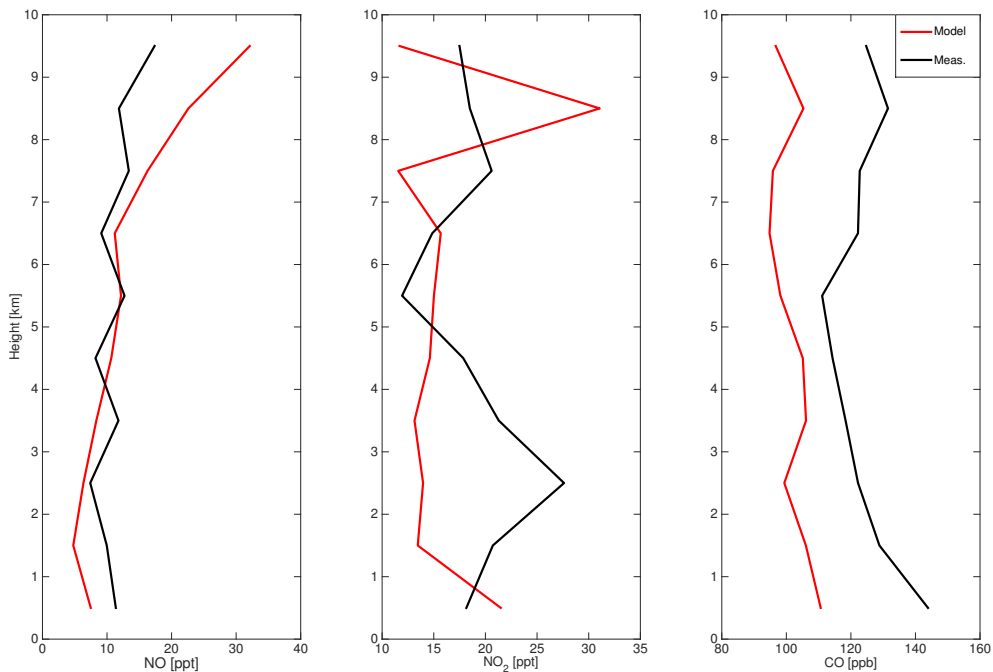

**Figure S 3.** Vertical profile for median modeled (red) and measured (black) NO, NO<sub>2</sub>, and CO for Honolulu based INTEX-B flight data binned by kilometer

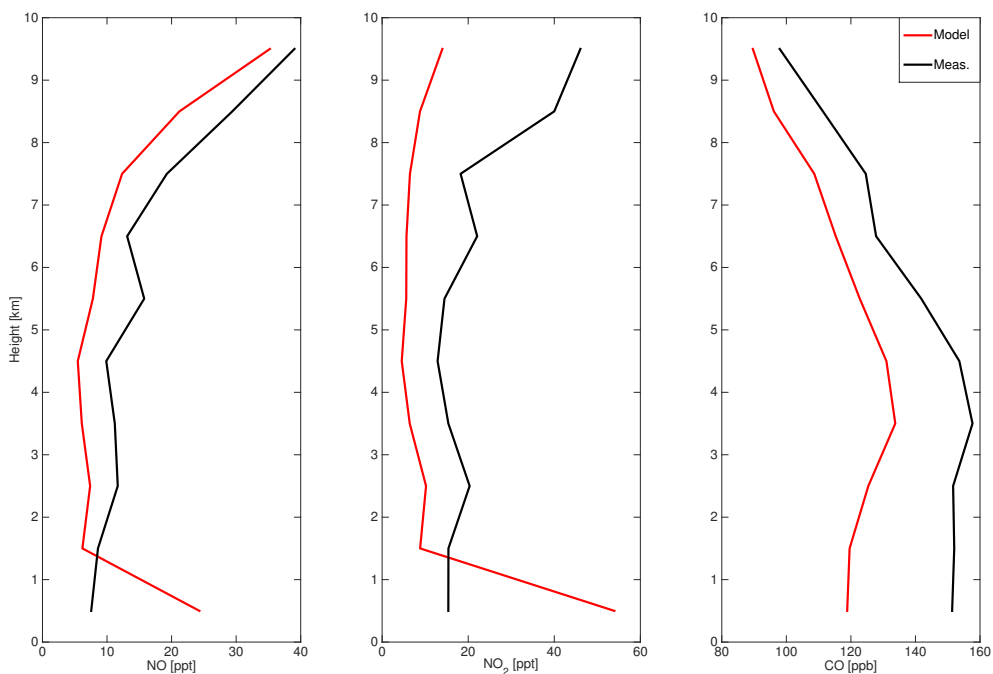

**Figure S 4.** Vertical profile for median modeled (red) and measured (black) NO, NO<sub>2</sub>, and CO for Anchorage based INTEX-B flight data binned by kilometer
